# Supplementary material for: Sucralose enhances the susceptibility to dextran sulfate sodium (DSS) induced colitis in mice with changes in gut microbiota
Source: Royal Society of Chemistry journal article supplement (doi:10.1039/d1fo01351c), 2021-01-01
Supplement: d1fo01351c1.pdf [file d1fo01351c1.pdf]

**Supplementary Table 1.** The criteria of histology analysis for colonic damage

| Colon damage score              | 0          | 1              | 2           | 3            |
|---------------------------------|------------|----------------|-------------|--------------|
| Crypt architecture damage       | None       | Regeneration   | Destruction |              |
| Edema in sub-mucosa             | None       | Mild           | Moderate    | Severe       |
| Inflammatory cells infiltration | None /rare | Lamina propria | Sub-mucosa  | Muscle layer |

**Supplementary Table 2.** Primers used for colon tissue qPCR

| Target gene  | Primer sequence(5'-3')      |
|--------------|-----------------------------|
| Gapdh        | F: AGGTCGGTGTGAACGGATTTG    |
|              | R: GGGGTCGTTGATGGCAACA      |
| TFF3         | F: TAATGCTGTTGGTGGTCCTG     |
|              | R: CAGCCACGGTTGTTACTG       |
| Muc2         | F: TTTCAAGCACCCCTGTAACC     |
|              | R: AGGTCCTGGTGTGAACTG       |
| Occludin     | F: CCTCCAATGGCAAAGTGAAT     |
|              | R: CTCCCCACCTGTCGTGTAGT     |
| ZO-1         | F: CCACCTCTGTCCAGCTCTTC     |
|              | R: CACCGGAGTGATGGTTTTCT     |
| Claudin-1    | F: TATGTTGGTGCCAGCATTGT     |
|              | R: TCATGCCACACAGAGATA       |
| TNF $\alpha$ | F: CATCTTCTCAAATTCGAGTGACAA |
|              | R: TGGGAGTAGACAAGGTACAACCC  |
| IL-1 $\beta$ | F: GAGCACCTTCTTTTCCTTCATCTT |
|              | R: TCACACACCAGCAGGTTATCATC  |
| IL-10        | F: ATAACTGCACCCACTCCCA      |
|              | R: GGGCATCACTTCTACCAGGT     |

|               |                                                         |
|---------------|---------------------------------------------------------|
| Reg3 $\gamma$ | F: CACCTTGGATTGAGAGTCAAGAC<br>R: AGGAATCGGCTATATTGCTGGT |
| Reg3 $\beta$  | F: AGTGGGGTGATGAGCAACTA<br>R: GGCAATGCGGTTCTGATACT      |
| Lipocalin-2   | F: CCAGGGCAGGTGGTTCGTTG<br>R: GCCCCTGACCAGGATGGAAG      |

**Supplementary Table 3.** Primers used for fecal microbes DNA qPCR.

| Target gene             | Primer sequence(5'-3')                                  |
|-------------------------|---------------------------------------------------------|
| Firmicutes              | F: GCTGCTAATACCGCATGATATGTC<br>R: CAGACGCGAGTCCATCTCAGA |
| Bacteroidetes           | F: GAGAGGAAGGTCCCCAC<br>R: CGCTACTTGGCTGGTTCAG          |
| Proteobacteria          | F: TAGGCTTGACATTGATAGAATC<br>R: CTTACGAAGGCAGTCTCCTTA   |
| Actinobacteria          | F: TGTAGCGGTGGAATGCGC<br>R: AATTAAGCCACATGCTCCGCT       |
| Lactobacillus           | F: ACGGGAGGCAGCAGTAGGGA<br>R: AGCCGTGACTTTCTGGTTGATT    |
| Bifidobacterium         | F: GATTCTGGCTCAGGATGAACGC<br>R: CTGATAGGACGCGACCCCAT    |
| Fusobacterium nucleatum | F: TGAGAGGGTGAACGGCCACAAG<br>R: GCGGCTGCTGGCACGTATTTAG  |
| Enterococcus faecium    | F: GAAAGGACACGATTCTACTTGCT<br>R: ATGAACGGAGCCCATCAAACC  |
| 16S rDNA                | F: GCAACGAGCGCAACCC<br>R: ACGGGCGGTGTGTAC               |
