# Supplementary figures and images for: Sucralose enhances the susceptibility to dextran sulfate sodium (DSS) induced colitis in mice with changes in gut microbiota
Source: Royal Society of Chemistry journal article supplement (doi:10.1039/d1fo01351c), 2021-01-01

The underlying raw images of Occludin and Claudin-1

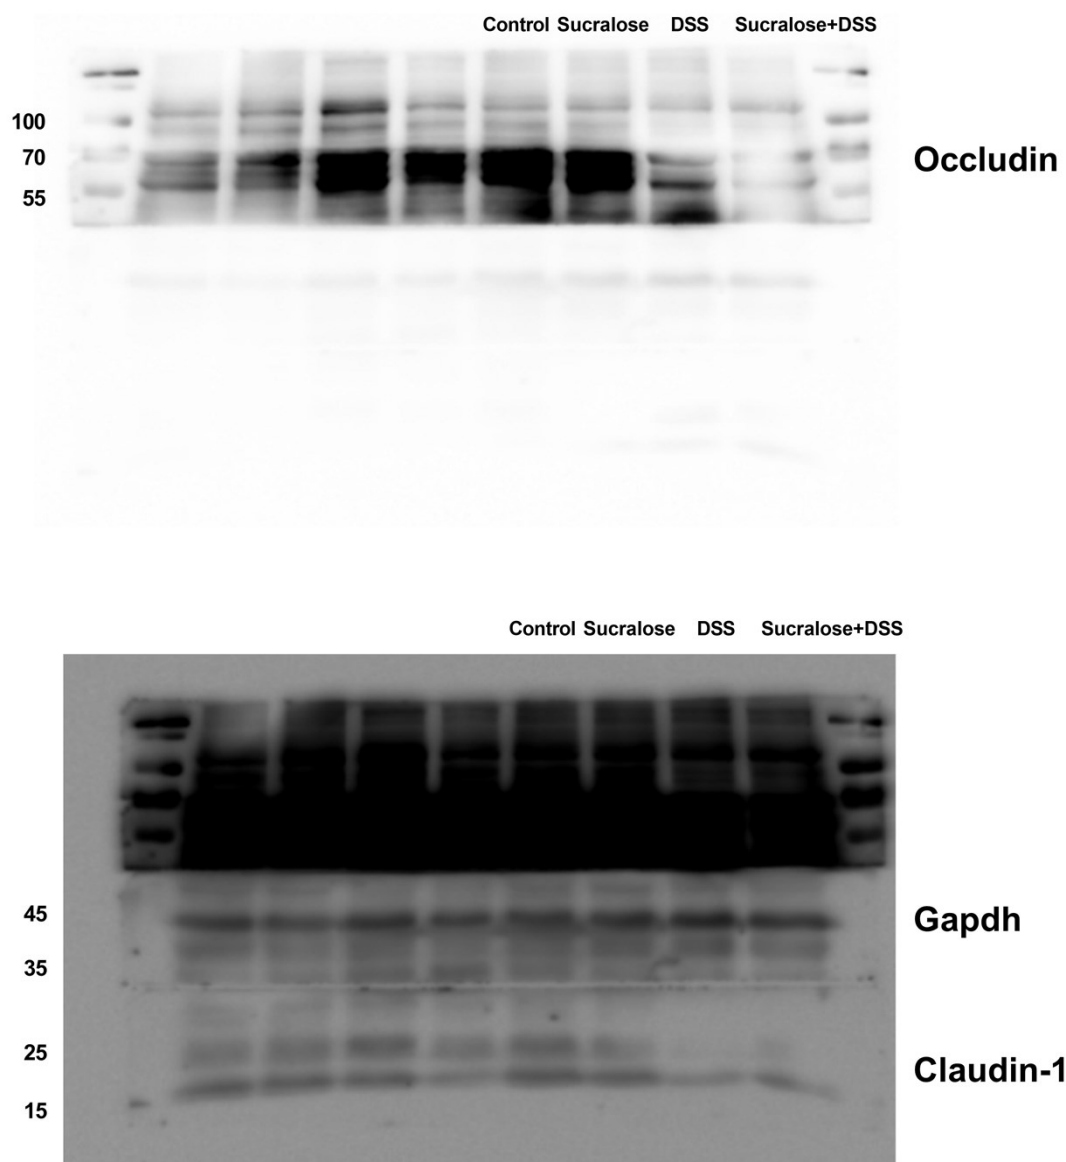

The underlying raw images of TLR5, NF-KB and MyD88

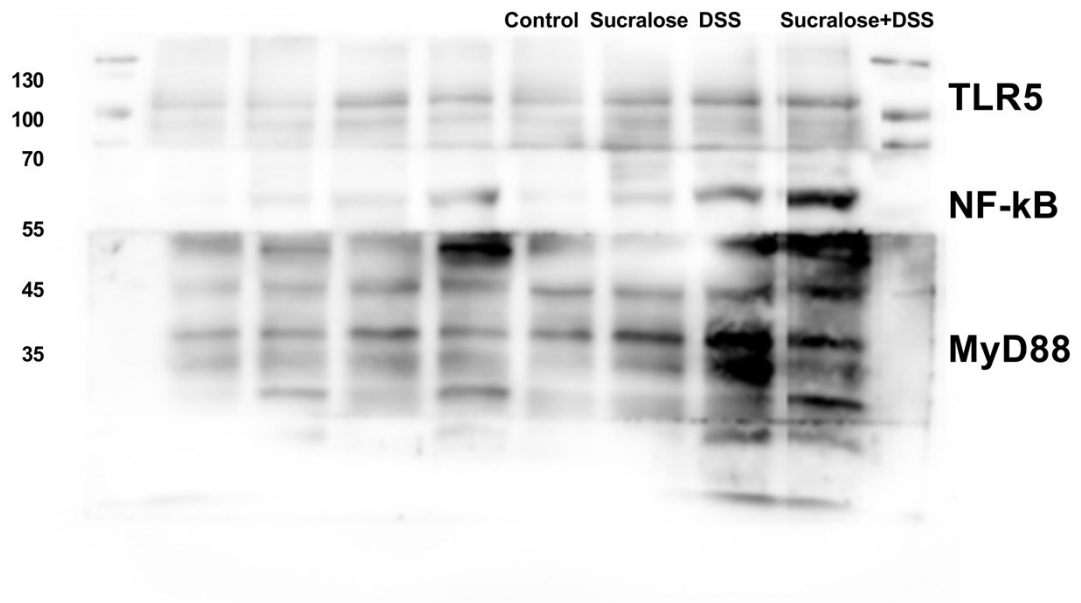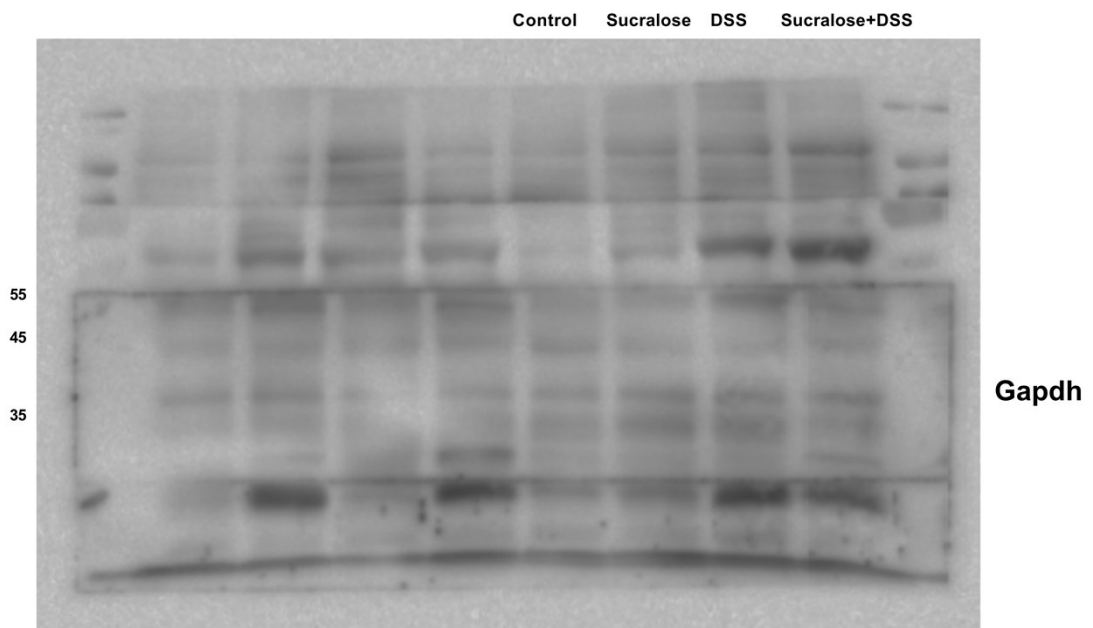

Supplement: d1fo01351c2.pdf [file d1fo01351c2.pdf]
